# Supplementary material for: Hybrid nanoparticles for magnetic and plasmonic hyperthermia
Source: Royal Society of Chemistry journal article supplement (doi:10.1039/c8cp02513d), 2018-01-01
Supplement: c8cp02513d1.pdf [file c8cp02513d1.pdf]

## Supporting Information: Hybrid magneto-plasmonic nanoheaters

Jesus G. Ovejero<sup>1,2</sup>, Irene Morales<sup>1,2</sup>, Patricia de la Presa<sup>1,2</sup>, Nicolas Mille<sup>3,4</sup>, Julian Carrey<sup>3,4</sup>

Miguel A. Garcia<sup>1,2</sup>, Antonio Hernando<sup>1,2</sup> and Pilar Herrasti<sup>5</sup>

<sup>1</sup>*Instituto de Magnetismo Aplicado, 'Salvador Velayos', UCM-CSIC-ADIF, Las Rozas, PO Box 155, Madrid 28230, Spain.*

<sup>2</sup>*Departamento Física de Materiales, Facultad Ciencias Físicas, Universidad Complutense de Madrid, 28040 Madrid, Spain*

<sup>3</sup>*Laboratoire de Physique et Chimie des Nano-Objets (LPCNO), Université de Toulouse, INSA, UPS, F-31077 Toulouse, France*

<sup>4</sup>*CNRS, UMR 5215, F-31077 Toulouse, France*

<sup>5</sup>*Departamento de Química Física Aplicada, Facultad de Ciencias, Universidad Autónoma de Madrid, Cantoblanco s/n, 28049 Madrid, Spain*

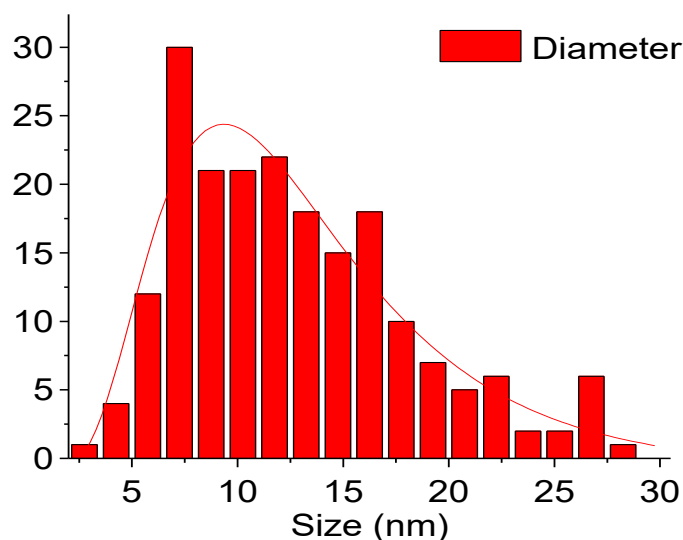

**Figure S1.** Diameter distribution of iron oxide nanoparticles (IONP) measured with transmission electron microscopy. Red line represents the log-normal fitting used to obtain the average diameter and the size dispersion.

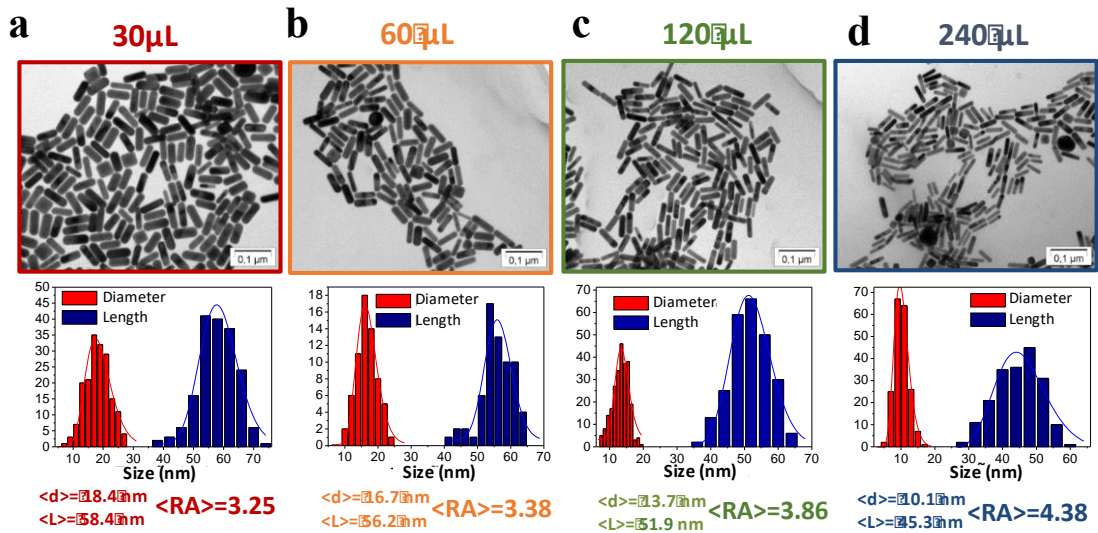

**Figure S2.** Transmission electron microscopies of Au nanorods (AuNR) prepared adding different amount of seeds to the growth solution: (a) 30  $\mu\text{L}$ , (b) 60  $\mu\text{L}$ , (c) 120  $\mu\text{L}$  and (d) 240  $\mu\text{L}$ . Histograms of the diameter and length distributions of each population of AuNR were included each picture. The average diameter and length of each population were obtained fitting the histograms with a log-normal distribution.

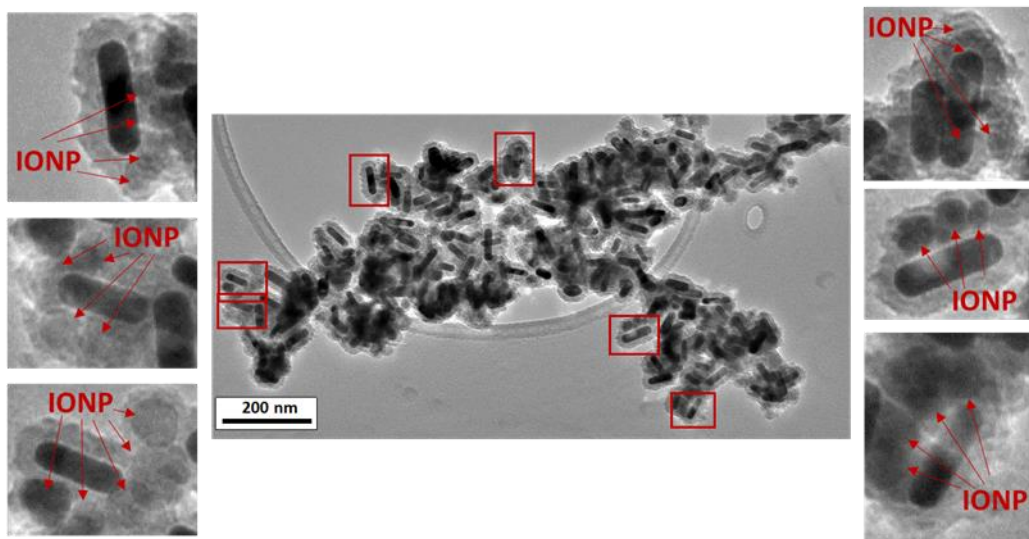

**Figure S3.** TEM image of HMPNPs. The IONPs in the HMPNPs were identified using red arrows in the insets displayed around the picture.

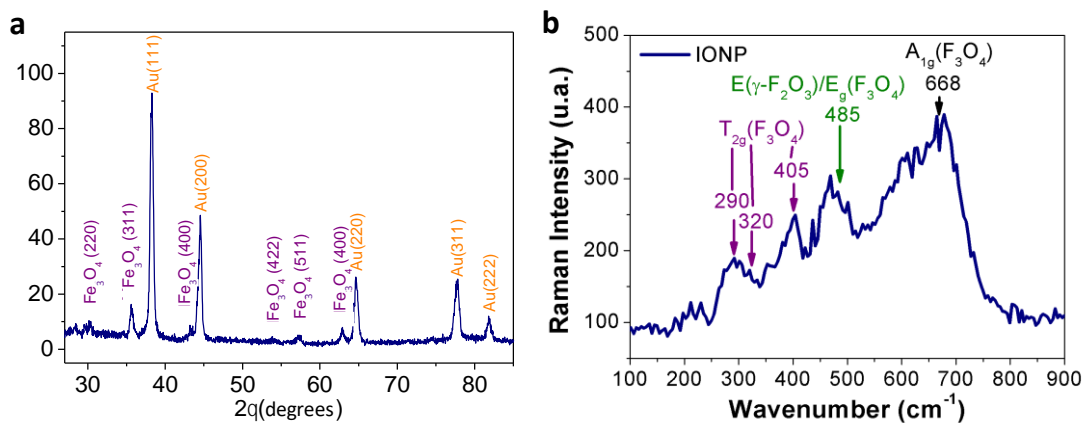

**Figure S4.** (a) X-ray diffraction pattern of hybrid magneto-plasmonic nanoparticles (HMPNP). Labels indicate the position of Au and  $\text{Fe}_3\text{O}_4$  crystal planes. (b) Raman spectra of IONP indicate the presence of  $\text{Fe}_3\text{O}_4$  and  $\gamma\text{-Fe}_2\text{O}_3$  phases.

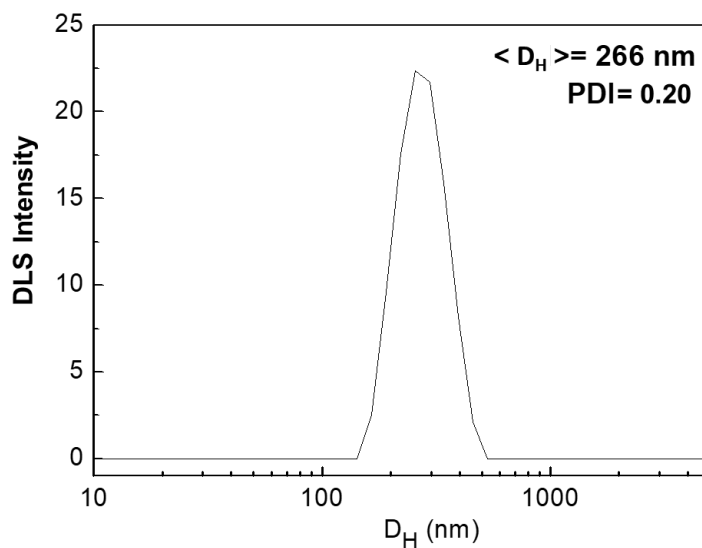

**Figure S5.** DLS measurements of hydrodynamic diameters ( $D_H$ ) of HMPNP and polydispersity index (PDI).

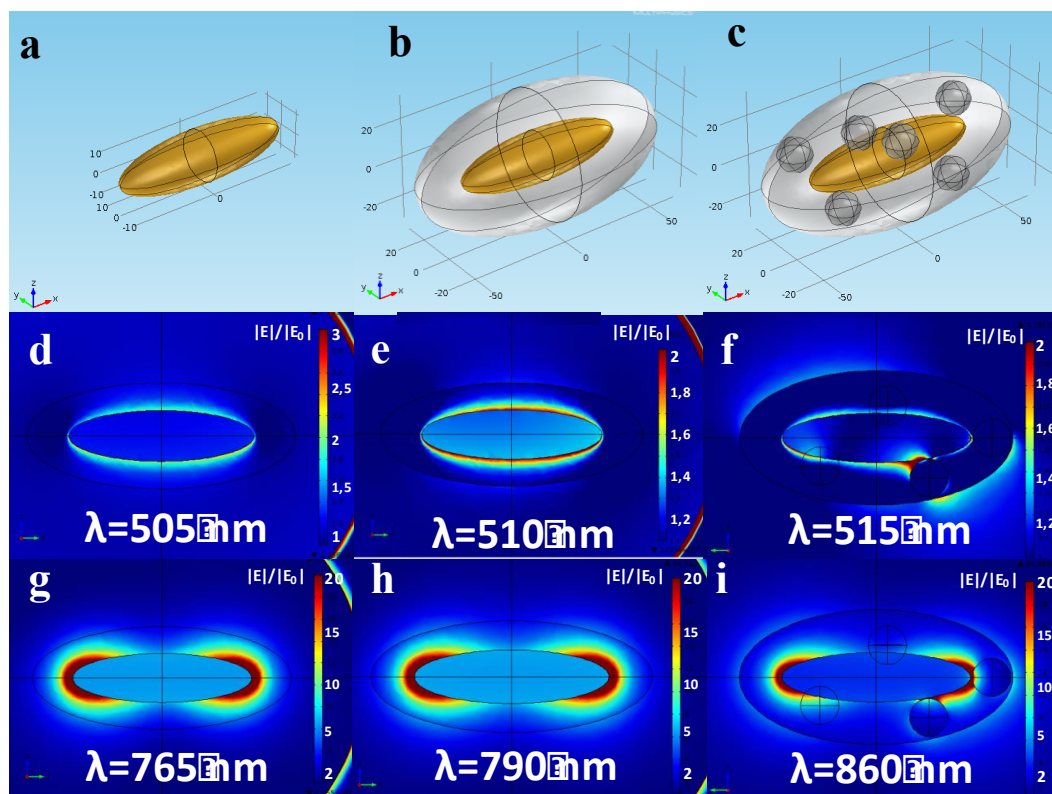

**Figure S6.** Geometries employed in the finite element method COMSOL simulations for: (a) AuNR, (b) AuNR@SiO<sub>2</sub> and (c) HMPNP. Near electric field enhancement generated by each nanostructure at the transversal (d,e,f) and longitudinal (g,h,i) plasmonic resonances wavelengths.

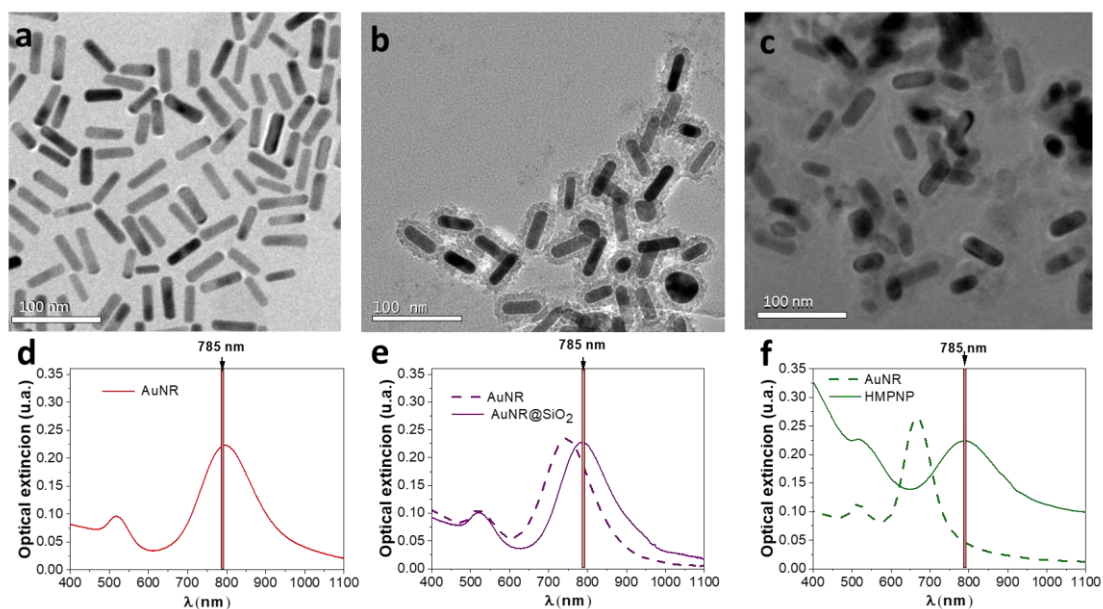

**Figure S7.** TEM images of the samples studied in photothermal comparative tests: (a) AuNR, (b) AuNR@SiO<sub>2</sub> and (c) HMPNPs. The position of longitudinal resonance was fitted to 785 nm by changing the aspect ratio of the AuNR employed for the synthesis. Optical extinction spectra of: (d) AuNR, (e) AuNR@SiO<sub>2</sub> and (f) HMPNPs. Dot lines indicated the spectra of the AuNR used in each case.
